# Supplementary material for: Pterostilbene alleviates abdominal aortic aneurysm via inhibiting macrophage pyroptosis by activating the miR-146a-5p/TRAF6 axis
Source: Royal Society of Chemistry journal article supplement (doi:10.1039/d3fo01235b), 2023-12-05

## SUPPLEMENTAL MATERIAL

### Major Resources Tables

**Supplementary Table I.**

**Patient clinical information (n=10)**

| <b>Patient</b> | <b>Gender</b> | <b>Age</b> | <b>Smoking status</b> | <b>Diameter (mm)</b> | <b>HL</b> | <b>HTN</b> | <b>CAD</b> |
|----------------|---------------|------------|-----------------------|----------------------|-----------|------------|------------|
| ID1            | male          | 65         | Yes                   | 75                   | No        | No         | No         |
| ID2            | male          | 76         | No                    | 45                   | Yes       | Yes        | Yes        |
| ID3            | male          | 67         | No                    | 61                   | No        | No         | No         |
| ID4            | male          | 68         | Yes                   | 63                   | No        | No         | No         |
| ID5            | male          | 52         | Yes                   | 40                   | No        | No         | No         |
| ID6            | male          | 70         | Yes                   | 64                   | No        | No         | No         |
| ID7            | male          | 66         | Yes                   | 53                   | No        | No         | No         |
| ID8            | male          | 70         | Yes                   | 50                   | No        | No         | No         |
| ID9            | male          | 62         | Yes                   | 79                   | Yes       | Yes        | No         |
| ID10           | male          | 56         | No                    | 54                   | No        | No         | No         |

HL = Hyperlipidemia

HTN = Hypertension

CAD = coronary artery disease

**Supplementary Table II.****Primer sequences for quantitative real-time PCR (from 5' to 3')**

| <b>Gene</b>   |         | <b>Sequence 5'-3'</b>    |
|---------------|---------|--------------------------|
| TNF- $\alpha$ | Forward | GAGGCCAAGCCCTGGTATG      |
| (human)       | Reverse | CGGGCCGATTGATCTCAGC      |
| TNF- $\alpha$ | Forward | ACTCCAGGCGGTGCCTATGT     |
| (mouse)       | Reverse | GTGAGGGTCTGGGCCATAGAA    |
| IL-6          | Forward | CCCTGAGAAAGGAGACATGTAAC  |
| (human)       | Reverse | CTCTTTGCTGCTTTCACACATG   |
| IL-6          | Forward | TGATGGATGCTACCAAAGTGA    |
| (mouse)       | Reverse | TGTGACTCCAGCTTATCTCTTGG  |
| IL-18         | Forward | TCTTCATTGACCAAGGAAATCGG  |
| (human)       | Reverse | TCCGGGGTGCATTATCTCTAC    |
| IL-18         | Forward | TGACCAAGTTCTCTTCGTTGACAA |
| (mouse)       | Reverse | CACAGCCAGTCCTCTTACTTCAC  |
| IL-1 $\beta$  | Forward | CCTGAGCTCGCCAGTGAAG      |
| (human)       | Reverse | TCCTGGAAGGAGCACTTCATCT   |
| IL-1 $\beta$  | Forward | TGCCACCTTTTGACAGTGATG    |
| (mouse)       | Reverse | GTGCTGCTGCGAGATTTGAA     |
| GAPDH         | Forward | GCACCGTCAAGGCTGAGAAC     |
| (human)       | Reverse | TGGTGAAGACGCCAGTGAAG     |
| GAPDH         | Forward | GTGTTCTACCCCAATGTGT      |
| (mouse)       | Reverse | ATTGTCATACCAGGAAATGAGCTT |
| miR-146a-5p   | Forward | CGCGTGAGAACTGAATTCCA     |
| (human/mouse) | Reverse | AGTGCAGGGTCCGAGGTATT     |
| U6            | Forward | CTCGCTTCGGCAGCACA        |
| (human/mouse) | Reverse | AACGCTTCACGAATTTGCGT     |
| TRAF6         | Forward | TTTGCTCTTATGGATTGTCCCC   |
| (human)       | Reverse | CATTGATGCAGCACAGTTGTC    |
| TRAF6         | Forward | AGTGCCCAGTTGACAATGAAA    |
| (mouse)       | Reverse | CACTTTACCGTCAGGGAAAGAAT  |
| RCAN1         | Forward | TTGTGTGGCAAACGATGATGT    |
| (mouse)       | Reverse | CCCAGGAACTCGGTCTTGT      |
| SIAH2         | Forward | CCAATGCCGCCAGAAGTTAAG    |
| (mouse)       | Reverse | CAGGGAAACAGAAGTCCGA      |

**Supplementary Table III.****Antibodies for Western blots**

| <b>Antibody</b>             | <b>Vendor or Source</b> | <b>Catalog #</b> | <b>Dilute Proportion</b> |
|-----------------------------|-------------------------|------------------|--------------------------|
| anti-NLRP3 (human)          | Proteintech             | 191771-1-AP      | 1:1000                   |
| anti-NLRP3 (mouse)          | CST                     | 15101S           | 1:1000                   |
| anti-GSDMD<br>(human/mouse) | HuaBio                  | HA721144         | 1:1000                   |
| anti-GSDMD (mouse)          | Abclonal                | A18281           | 1:1000                   |
| Anti-Caspase1 p10 (mouse)   | Invitrogen              | PA5-105049       | 1:1000                   |
| anti-Caspase 1(mouse)       | Abcam                   | Ab179515         | 1:1000                   |
| anti-TRAF6                  | Abclonal                | A0973            | 1:1000                   |
| anti-GAPDH                  | Proteintech             | 60004-1-Ig       | 1:5000                   |

**Supplementary Table IV.****Antibodies for immunofluorescence staining**

| <b>Antibody</b>                        | <b>Vendor or Source</b> | <b>Catalog #</b> | <b>Dilute Proportion</b> |
|----------------------------------------|-------------------------|------------------|--------------------------|
| Anti-Caspase1 p10<br>(human and mouse) | Invitrogen              | PA5-105049       | 1:200                    |
| Anti-NLRP3 (human and<br>mouse)        | Abclonal                | A5652            | 1:100                    |
| Anti-GSDMD (mouse and<br>human)        | Abclonal                | A18281           | 1:200                    |
| Anti-SMC a-actin (mouse)               | Proteintech             | 67735-1-Ig       | 1:400                    |
| Anti-CD68 (mouse)                      | Abcam                   | Ab955            | 1:100                    |
| Anti-CD80 (mouse)                      | Abcam                   | Ab254579         | 1:50                     |
| Anti-CD206 (mouse)                     | Abcam                   | Ab64693          | 1:500                    |

## Supplementary Figure legends

### **Supplementary Figure 1 PTE enhances the number of SMCs in the aortic wall.**

Representative immunofluorescence staining with antibodies against  $\alpha$ -actin (red colour) and nuclear counterstaining with DAPI (blue colour) in PPE-infused C57BL/6 mice. Scale bar=100  $\mu$ m and 50  $\mu$ m. PPE, porcine pancreatic elastase; PTE, pterostilbene. SMCs, smooth muscle cells.

### **Supplementary Figure 2 PTE reduces the levels of the proinflammatory**

#### **cytokines in mouse aortas and plasma.** (A-D) PCR analysis of TNF- $\alpha$ , IL-6, IL-1 $\beta$ ,

and IL-18 in aortas from PPE-infused C57BL/6 mice. \* $p < 0.05$ ;  $n = 7$  to 11

mice/group (parametric unpaired t test). (E-H) PCR analysis of TNF- $\alpha$ , IL-6, IL-1 $\beta$

and IL-18 expression in the aortas of Ang II-infused ApoE $^{-/-}$  mice. \* $p < 0.05$ ;  $n=9$  to

10 mice/group (parametric unpaired t test). (I-L) Plasma concentrations of TNF- $\alpha$ ,

IL-6, IL-1 $\beta$ , and IL-18 in Ang II-infused ApoE $^{-/-}$  mice in the two groups. \* $p < 0.05$ ;

$n=6$  to 9 mice/group (parametric unpaired t test). PPE, porcine pancreatic elastase;

PTE, pterostilbene.

### **Supplementary Figure 3 Oral PTE administration does not alter systolic blood**

#### **pressure or body weight gain in mice.** (A) Systolic blood pressure on day 28 after

Ang II infusion.  $p=0.2025$ ,  $n=7$  to 9 mice/group (parametric unpaired t test). ns for

not significant vs. vehicle group. (B) No difference in body weight at baseline

( $p=0.4984$ ) and at 28 days ( $p=0.1850$ ) following treatment with vehicle or PTE,  $n=7$

to 10 mice/group (two-way ANOVA). ns for not significant vs. vehicle group. (C-F)

The level of blood lipids in mice after treatment with vehicle or PTE. \*\*\* $p < 0.001$ , \* $p < 0.05$ ;  $n = 6$  to  $9$  mice/group (parametric unpaired t test). All data are means $\pm$ SD. CHOL, cholesterol; HDL, high density lipoprotein; LDL, low density lipoprotein; PTE, pterostilbene; TG, triglyceride.

**Supplementary Figure 4 Macrophage pyroptosis is activated in human and murine AAA tissues.** (A and B) Western blot analysis of pyroptosis-related proteins in human AAA and normal aortas (NA) from organ donor samples. \*\* $p < 0.01$  and \* $p < 0.05$ ;  $n = 8$  to  $9$  per group (parametric paired t test). (C) PCR analysis of inflammatory cytokines in human NA and AAA samples. \*\*\* $p < 0.001$  and \* $p < 0.05$ ;  $n = 9$  to  $13$  per group (parametric paired t test). (D) Representative photographs showing the macroscopic features of the aortas at baseline (day 0) and 14 days after PPE infusion in C57BL/6 mice. (E and F) Representative images and quantification of immunofluorescence staining with antibodies against pyroptosis-related proteins (NLRP3, GSDMD and Caspase1 p10) conjugated with Alexa Fluor 488 (green colour) and antibodies against  $\alpha$ -actin and CD68 conjugated with Alexa Fluor 594 (red colour); the nucleus was counterstained with DAPI (blue colour) in PPE-infused C57BL/6 mice. Scale bar=200  $\mu$ m. (G and H) Aortic sections were prepared from human AAAs, representative images and quantification of immunofluorescence stained with antibodies against  $\alpha$ -actin or CD68 (macrophages) conjugated with Alexa Fluor 595 (red), and antibodies against related pyroptosis proteins conjugated (NLRP3, GSDMD and Caspase1 p10) with Alexa Fluor 488 (green), and the nucleus

was counterstained with DAPI (blue). Scale bar=200  $\mu\text{m}$ . AAA, abdominal aortic aneurysm; NA, normal aorta; PPE, porcine pancreatic elastase.

**Supplementary Figure 5 The level of macrophage markers was decreased in PTE-treated mouse aortas compared with vehicle-treated mouse aortas.** Aortic sections were prepared from PPE-induced AAAs, stained with antibodies against CD68 (macrophages) and CD80 (M1 macrophage marker) conjugated with Alexa Fluor 594 (red), and the nucleus was counterstained with DAPI (blue). Scale bar=100  $\mu\text{m}$ . PTE, pterostilbene.

**Supplementary Figure 6 PTE protects against LPS-induced ROS stress in macrophage.** Raw 264.7 cells were pretreated with or without PTE (2  $\mu\text{M}$ , 4  $\mu\text{M}$  or 6  $\mu\text{M}$ ) for 24 h, followed by exposure to LPS (1  $\mu\text{g}/\text{mL}$ ). After 6 h, ROS levels were measured using DCFH-DA. Scale bar=200  $\mu\text{m}$ . LPS, lipopolysaccharide; PTE, pterostilbene.

**Supplementary Figure 7 PTE inhibits macrophage pyroptosis in vivo.** Western blot analysis of pyroptosis-related proteins in the peritoneal macrophages of Ang II-infused ApoE<sup>-/-</sup> mice treated with PTE (4  $\mu\text{M}$ , 24 h) or vehicle and then stimulated with LPS (1  $\mu\text{g}/\text{mL}$ , 24 h) and ATP (5 mM, 2 h). \*\* $p < 0.01$  and \* $P < 0.05$  vs. vehicle group;  $n = 3$  per group (parametric unpaired t test). ATP, adenosine triphosphate; LPS, lipopolysaccharide; PTE, pterostilbene.

**Supplementary Figure 8 PTE suppresses macrophage pyroptosis and exerts the strongest effect among the four polyphenols.** (A-E) Western blot analysis of pyroptosis-related proteins in RAW 264.7 macrophages that were pretreated with vehicle or PTE (4  $\mu$ M, 24 h), RSV (10  $\mu$ M, 24 h), OXY (10  $\mu$ M, 24 h), or RHA (10  $\mu$ M, 24 h) and then stimulated with LPS (1  $\mu$ g/mL, 24 h) and ATP (5 mM, 2 h).  $^{##}p<0.01$  and  $^{\#}p<0.05$  vs. NC group;  $^{**}p<0.01$  and  $^{*}p<0.05$  vs. LPS group; n=3 per group (parametric unpaired t test). (F-H) PCR analysis of IL-1 $\beta$ , IL-6, and TNF- $\alpha$  in Raw 264.7 cells treated as described in (a).  $^{###}p<0.001$  vs. NC group;  $^{***}p<0.001$ ,  $^{**}p<0.01$  and  $^{*}p<0.05$  vs. LPS group. n=3 to 6 per group (parametric unpaired t test). ATP, adenosine triphosphate; LPS, lipopolysaccharide; OXY, oxyresveratrol; PTE, pterostilbene. RHA, rhapontigenin; RSV, resveratrol.

**Supplementary Figure 9 MiR-146a-5p inhibitor weakened the inhibitory effect of PTE on the uptake of YO-PRO-1 dye.** Raw 264.7 macrophages that were pretreated with the miR-146a-5p inhibitor (50 nM) or NC inhibitor (50 nM) for 48 h, treated with PTE (4  $\mu$ M, 24 h) and then stimulated with LPS (1  $\mu$ g/mL, 24 h) and ATP (5 mM, 2 h). and then cells were stained with YO-PRO-1 dye (green). Hoechst (blue) was used to stain nucleus. Raw 264.7 macrophages treated with 0.1% Triton were used to be the positive control group. Scale bar=100  $\mu$ m. ATP, adenosine triphosphate; LPS, lipopolysaccharide; PTE, pterostilbene.

**Supplementary Figure 10 MiR-146a-5p inhibitor weakened the inhibitory effect of PTE on macrophage pyroptosis.** Raw 264.7 macrophages that were pretreated



with the miR-146a-5p inhibitor (50 nM) or NC inhibitor (50 nM) for 48 h, treated with PTE (4  $\mu$ M, 24 h) and then stimulated with LPS (1  $\mu$ g/mL, 24 h) and ATP (5 mM, 2 h), pyroptosis levels were measured using Calcein AM (green)/ PI (red) double-stained. Raw 264.7 macrophages treated with 0.1% Triton were used to be the positive control group. Scale bar=100  $\mu$ m. ATP, adenosine triphosphate; LPS, lipopolysaccharide; PI, propidium iodide; PTE, pterostilbene.

**Supplementary Figure 11** (A) Schematic view of the generation of miR-146a-5p<sup>-/-</sup> mice by CRISPR/Cas-mediated genome engineering. (B) Genotyping of heterozygous miR-146a-5p-knockout mice by PCR analysis. (C) Relative miR-146a-5p expression in macrophages of normal mice and macrophage miR-146a-5p-knockout mice (3 months, male; n=4 mice per genotype). The data were analysed using parametric unpaired t tests, \*\*\* $p$ <0.001. KO, miR-146a-5p-knockout mice.

**Supplementary Figure 12 qPCR analysis of RCAN1 and SIAH2 in Raw 264.7 macrophages.** (A and B) Raw 264.7 macrophages were pretreated with vehicle or PTE (4  $\mu$ M, 24 h) and then stimulated with LPS (1  $\mu$ g/mL, 24 h) and ATP (5 mM, 2 h), \*\* $p$ <0.01 and \* $p$ <0.05; n=8-12 per group (parametric unpaired t test). (C and D) Raw 264.7 macrophages were pretreated with the miR-146a-5p inhibitor (50 nM) or NC inhibitor (50 nM) for 48 h, treated with PTE (4  $\mu$ M, 24 h) and then stimulated with LPS (1  $\mu$ g/mL, 24 h) and ATP (5 mM, 2 h), ns for not significant, n=7-8 per group (parametric unpaired t test). ATP, adenosine triphosphate; LPS,

lipopolysaccharide; PTE, pterostilbene.

**Supplementary Figure 13 qPCR analysis of TRAF6, TNF- $\alpha$ , IL-6, IL-1 $\beta$ , and**

**IL-18 expression in mouse peritoneal macrophages and mouse aortas. (A-D)**

Peritoneal macrophages from PPE-infused C57BL/6 mice after transfection with AAV carrying a TRAF6 overexpression plasmid (AAV-TRAF6) or a control plasmid (AAV-GFP) and then stimulated with LPS (100 ng/mL, 24 h), \* $p < 0.05$ ;  $n = 8$  per group (parametric unpaired t test). (E-I) Mouse aortas from PPE-infused C57BL/6 mice after transfection with AAV carrying a TRAF6 overexpression plasmid (AAV-TRAF6) or a control plasmid (AAV-GFP), \* $p < 0.05$ ;  $n = 6-8$  per group (parametric unpaired t test). AAV, adeno-associated virus; LPS, lipopolysaccharide; PPE, porcine pancreatic elastase.

Supplementary Figure 1

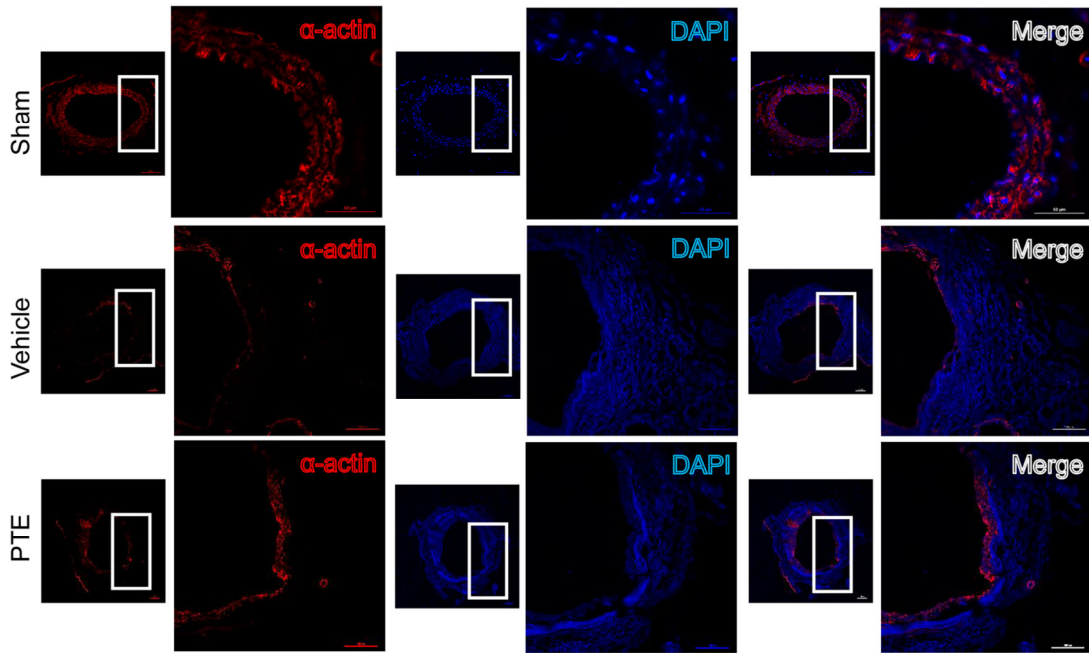

Supplementary Figure 2

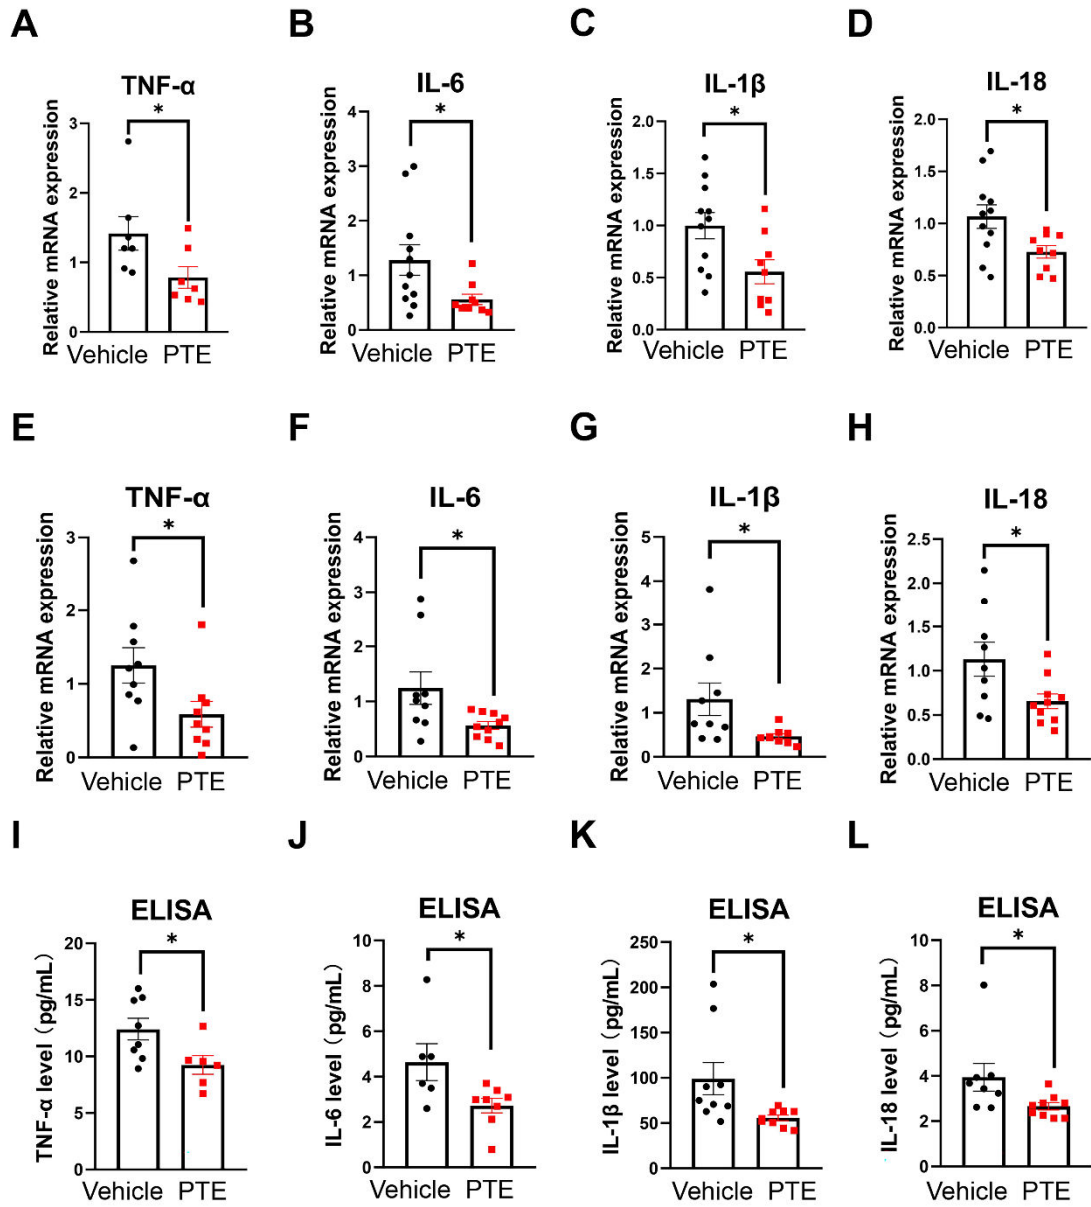

Supplementary Figure 3

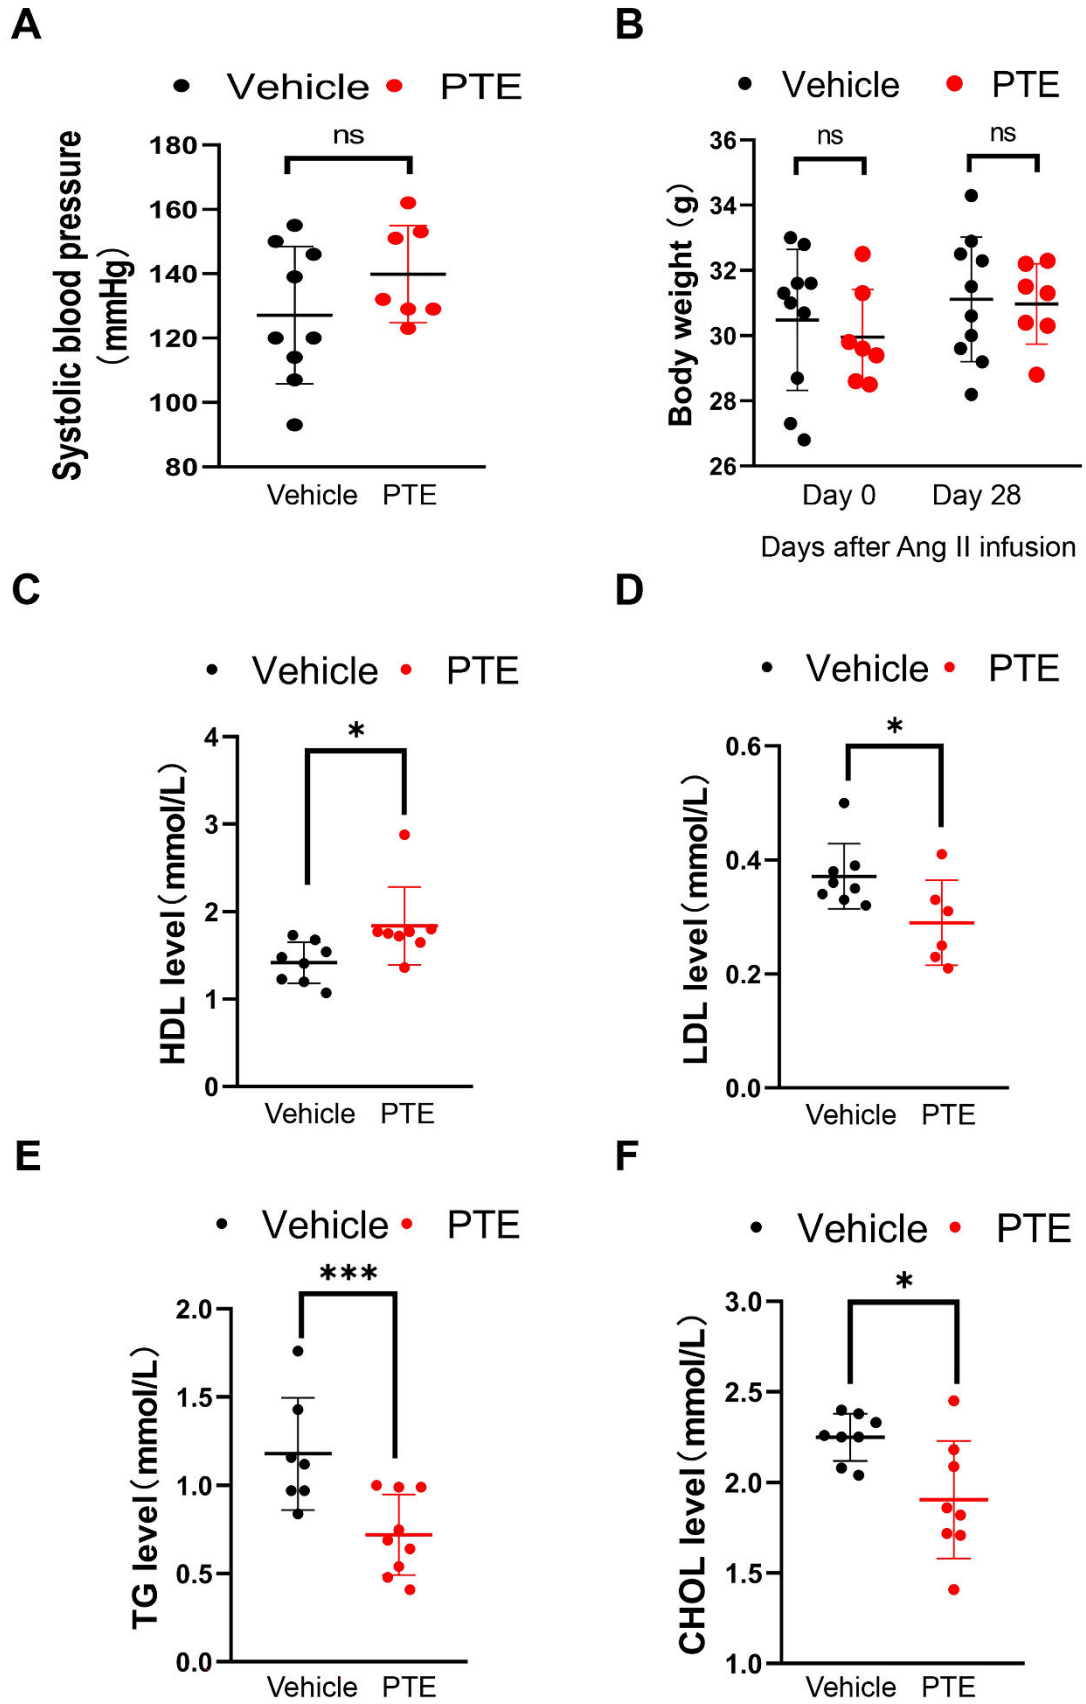

# Supplementary Figure 4

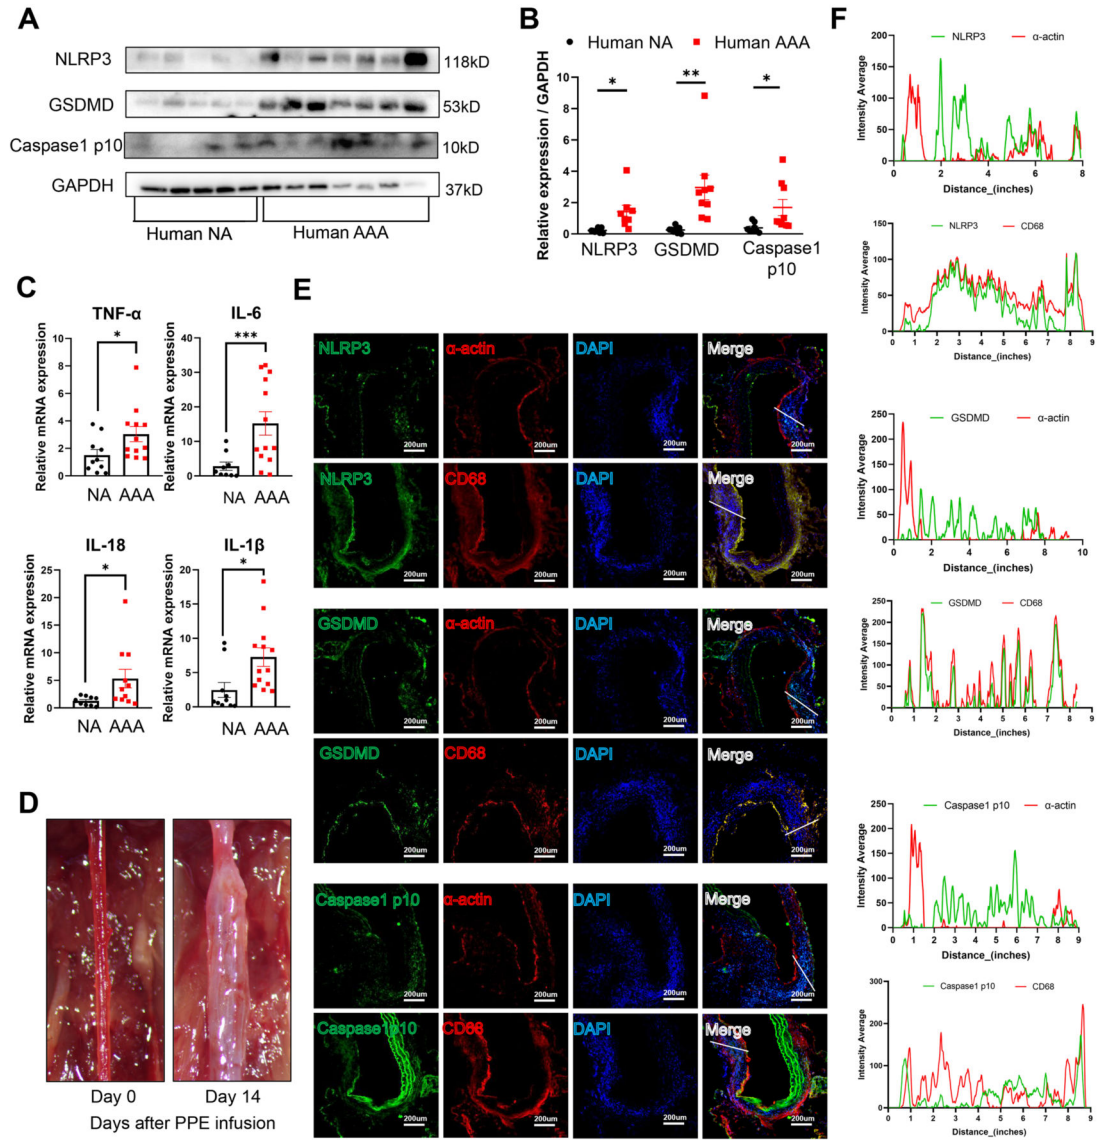

# Supplementary Figure 4 Continued

**G**

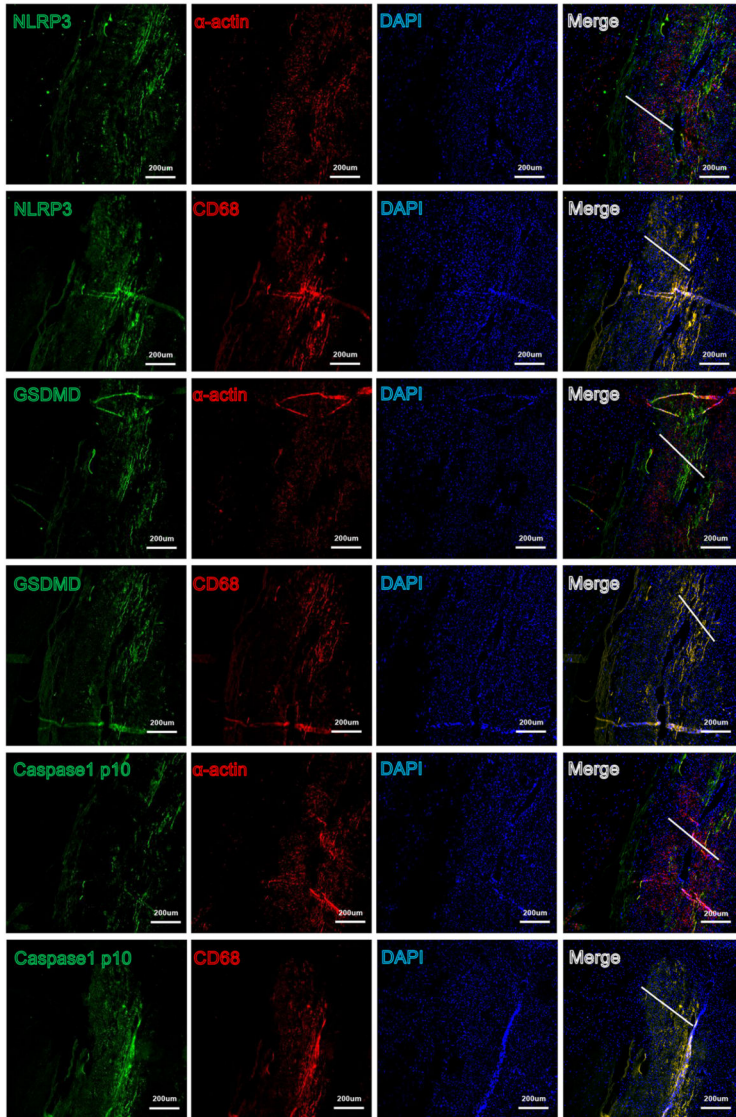

**H**

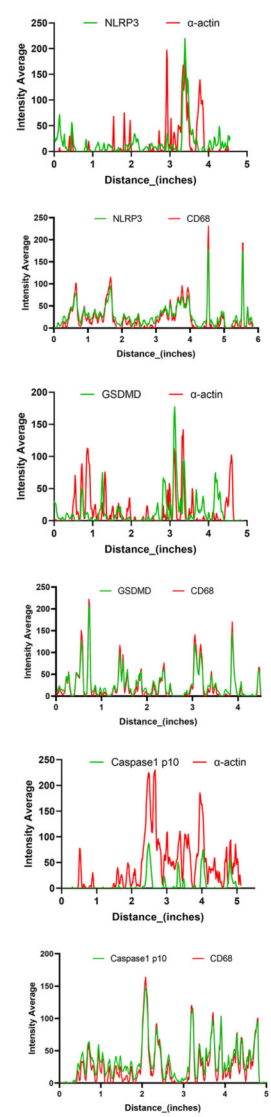

Supplementary Figure 5

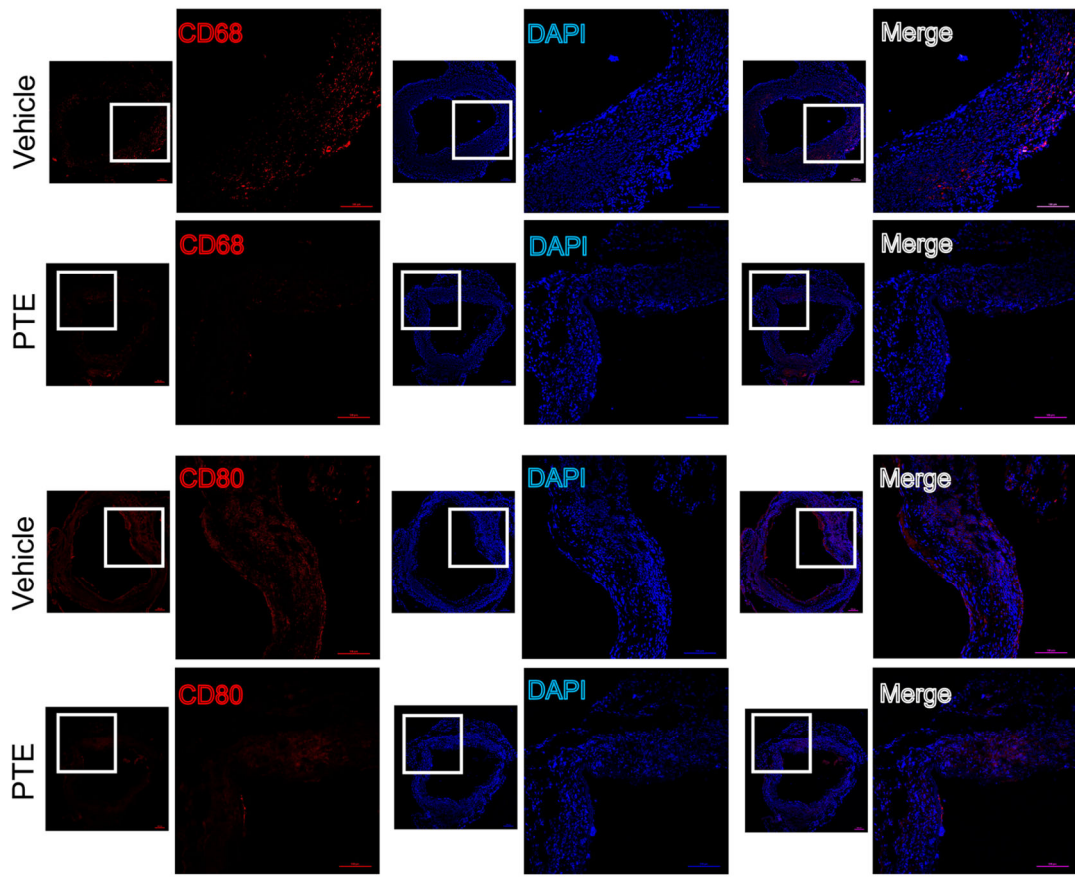



## Supplementary Figure 6

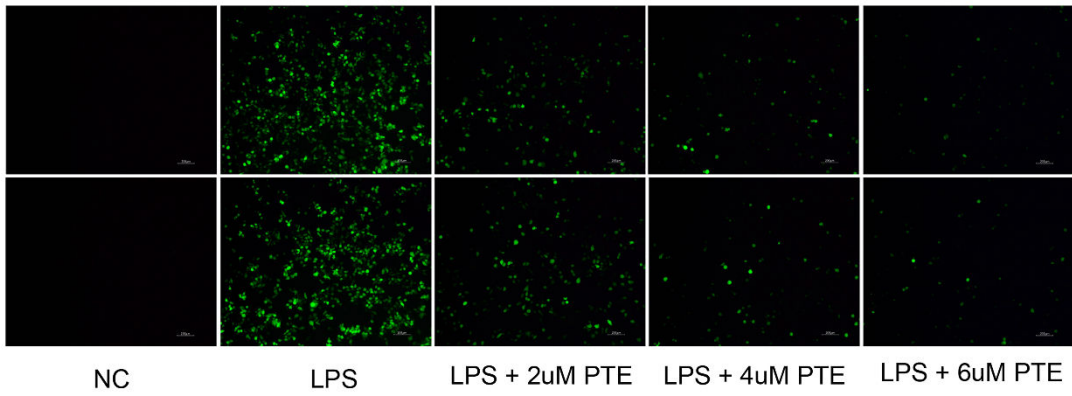

# Supplementary Figure 7

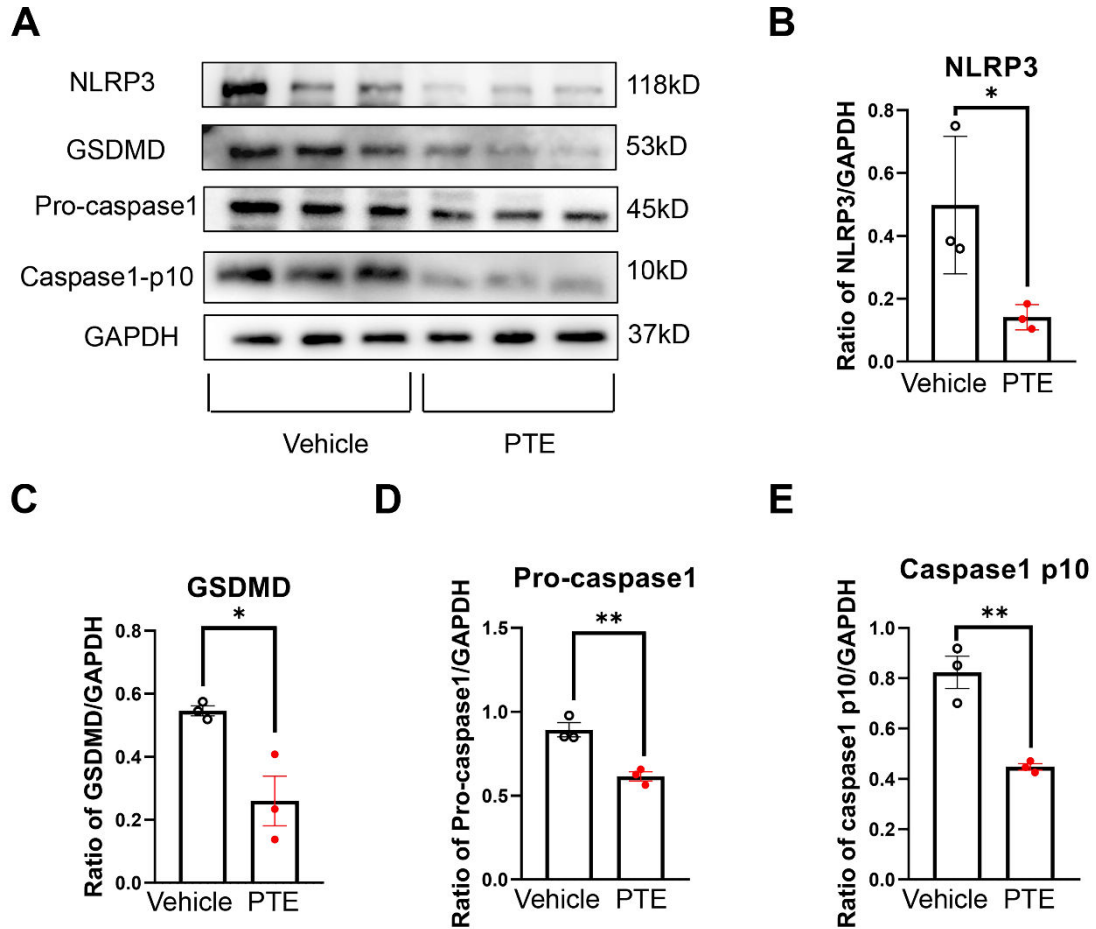

Supplementary Figure 8

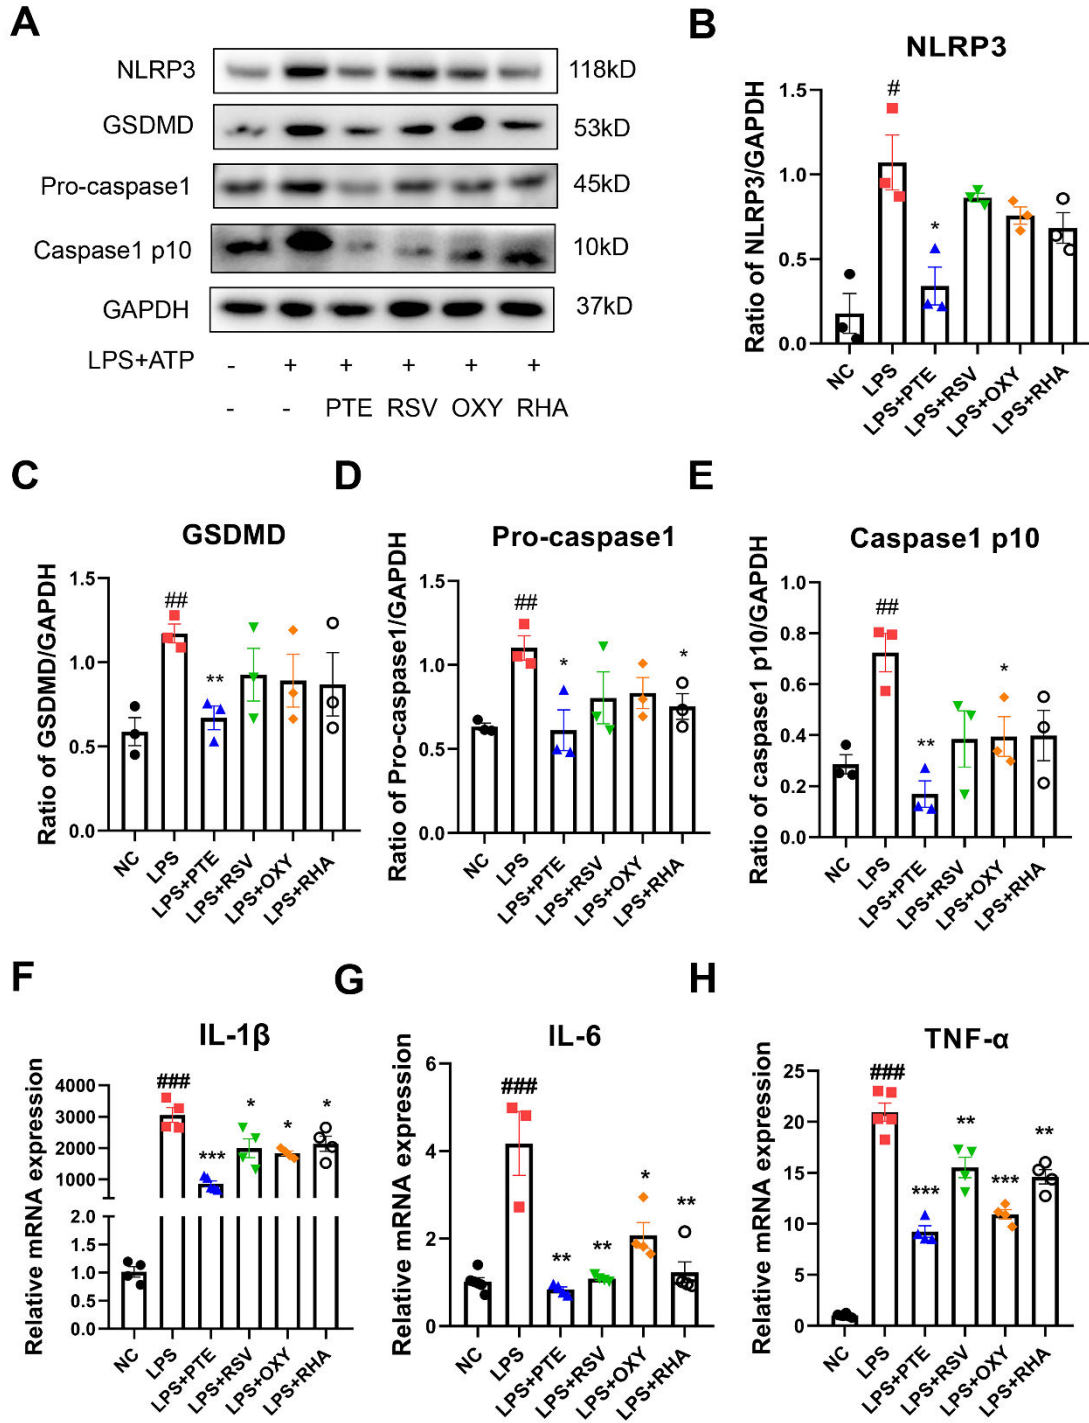

## Supplementary Figure 9

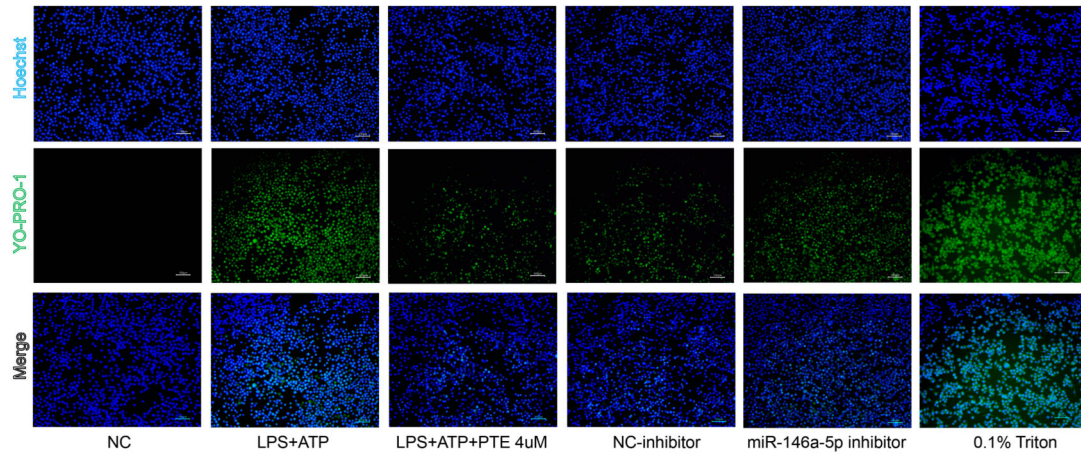

## Supplementary Figure 10

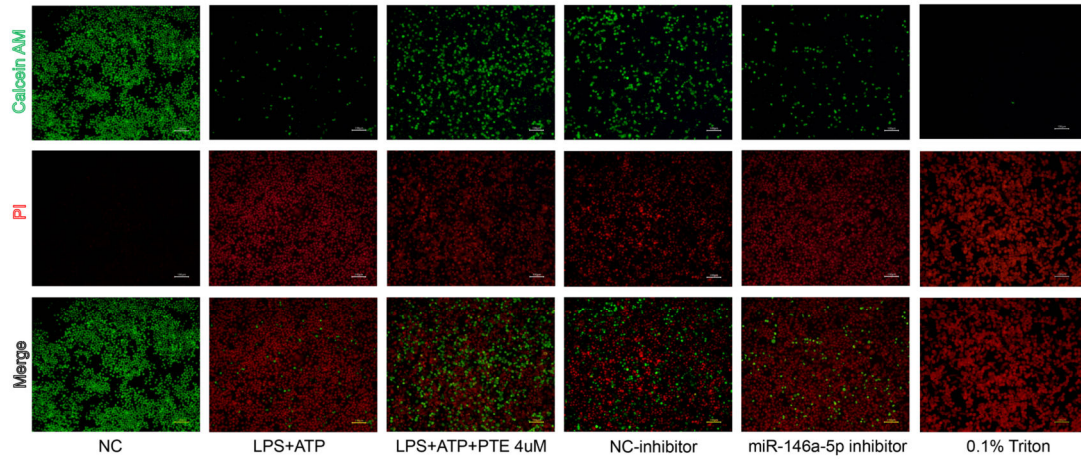

Supplementary Figure 11

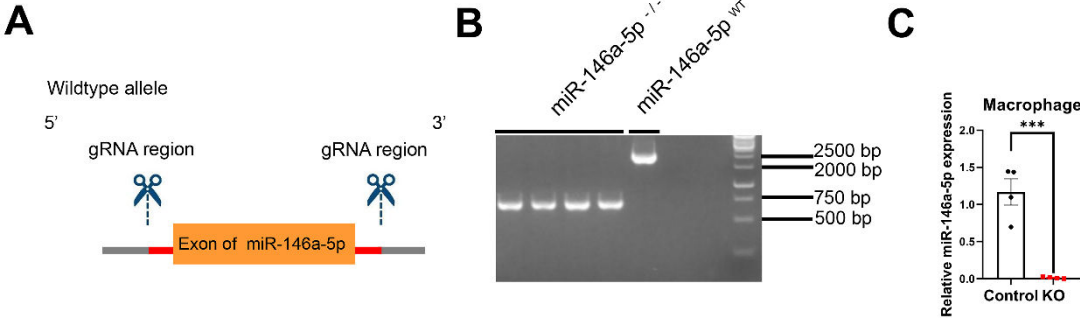

# Supplementary Figure 12

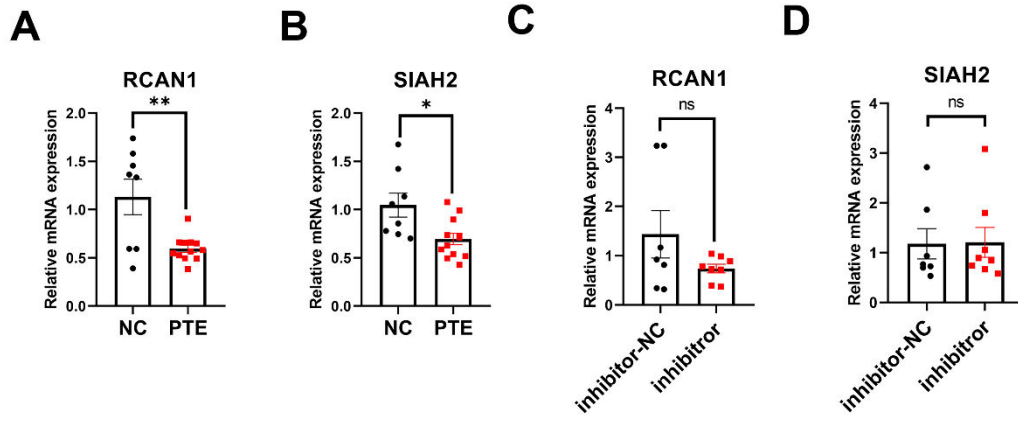

Supplementary Figure 13

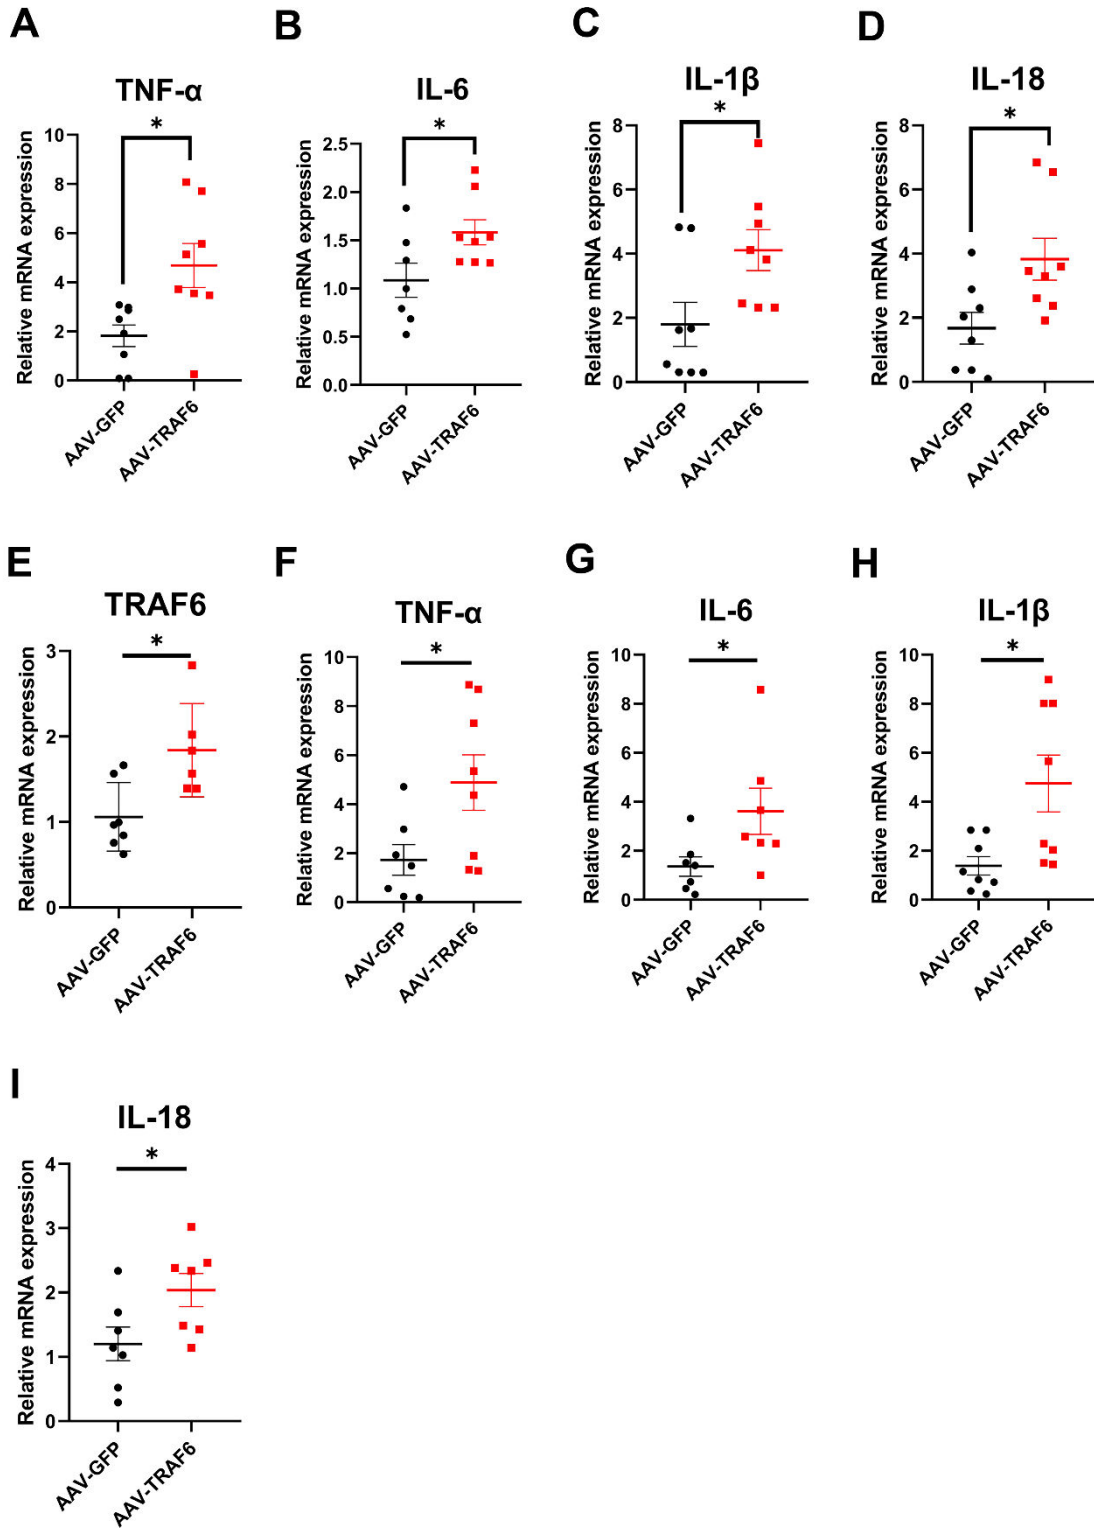

Supplement: d3fo01235b1.pdf [file d3fo01235b1.pdf]
